# Supplementary material
Source: PubMed Central journal article supplement (PMC4959060)
Supplement: AEM.03901-15_zam999117123so1.pdf [file AEM.03901-15_zam999117123so1.pdf]

## **Supplementary material**

### **Mycelia-like Networks Increase Bacterial Dispersal, Growth and Biodegradation in a Model Ecosystem at Varying Water Potentials**

Anja Worrich,<sup>a,b</sup> Sara König,<sup>a,c</sup> Anja Miltner,<sup>b</sup> Thomas Banitz,<sup>c</sup> Florian Centler,<sup>a</sup> Karin Frank,<sup>c,d,e</sup> Martin Thullner,<sup>a</sup> Hauke Harms,<sup>a,d</sup> Matthias Kästner,<sup>b,#</sup> and Lukas Y Wick<sup>a</sup>

UFZ- Helmholtz Centre for Environmental Research, Permoserstraße 15, 04318 Leipzig, Germany, Department of Environmental Microbiology<sup>a</sup>; UFZ- Helmholtz Centre for Environmental Research, Permoserstraße 15, 04318 Leipzig, Germany, Department of Environmental Biotechnology<sup>b</sup>; UFZ- Helmholtz Centre for Environmental Research, Permoserstraße 15, 04318 Leipzig, Germany, Department of Ecological Modelling<sup>c</sup>; German Centre for Integrative Biodiversity Research (iDiv) Halle-Jena-Leipzig, Deutscher Platz 5e, D-04103 Leipzig, Germany<sup>d</sup>; University of Osnabrück, Institute for Environmental Systems Research, Barbarastaße. 12, 49076 Osnabrück, Germany<sup>e</sup>

#Address correspondence to Matthias Kästner, [matthias.kaestner@ufz.de](mailto:matthias.kaestner@ufz.de).

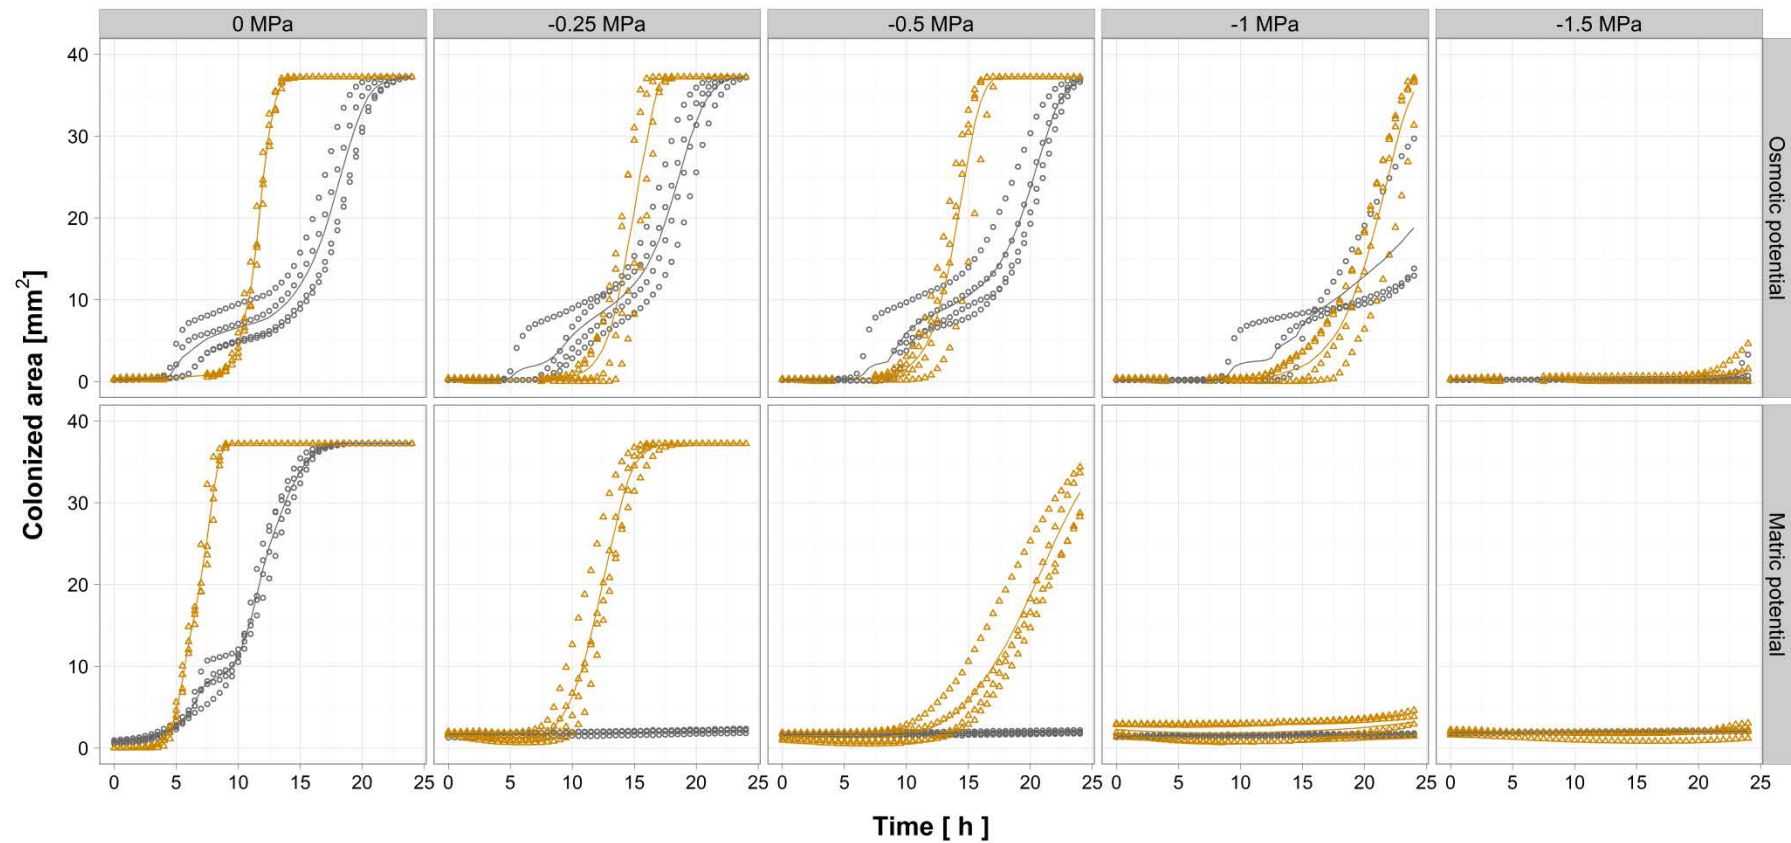

**Figure S1:** Dispersal of *P. putida* KT2440-gfp in absence (gray circles) and presence (orange triangles) of dispersal networks for the different  $\Delta\Psi_o$  and  $\Delta\Psi_m$ . Dispersal was analyzed microscopically by measuring the colonized area every 30 min for 24 h using. Individual points represent the values obtained from the replicate microcosms within the multiwell plate and the solid lines show the averages of replicates used for AUC calculation.

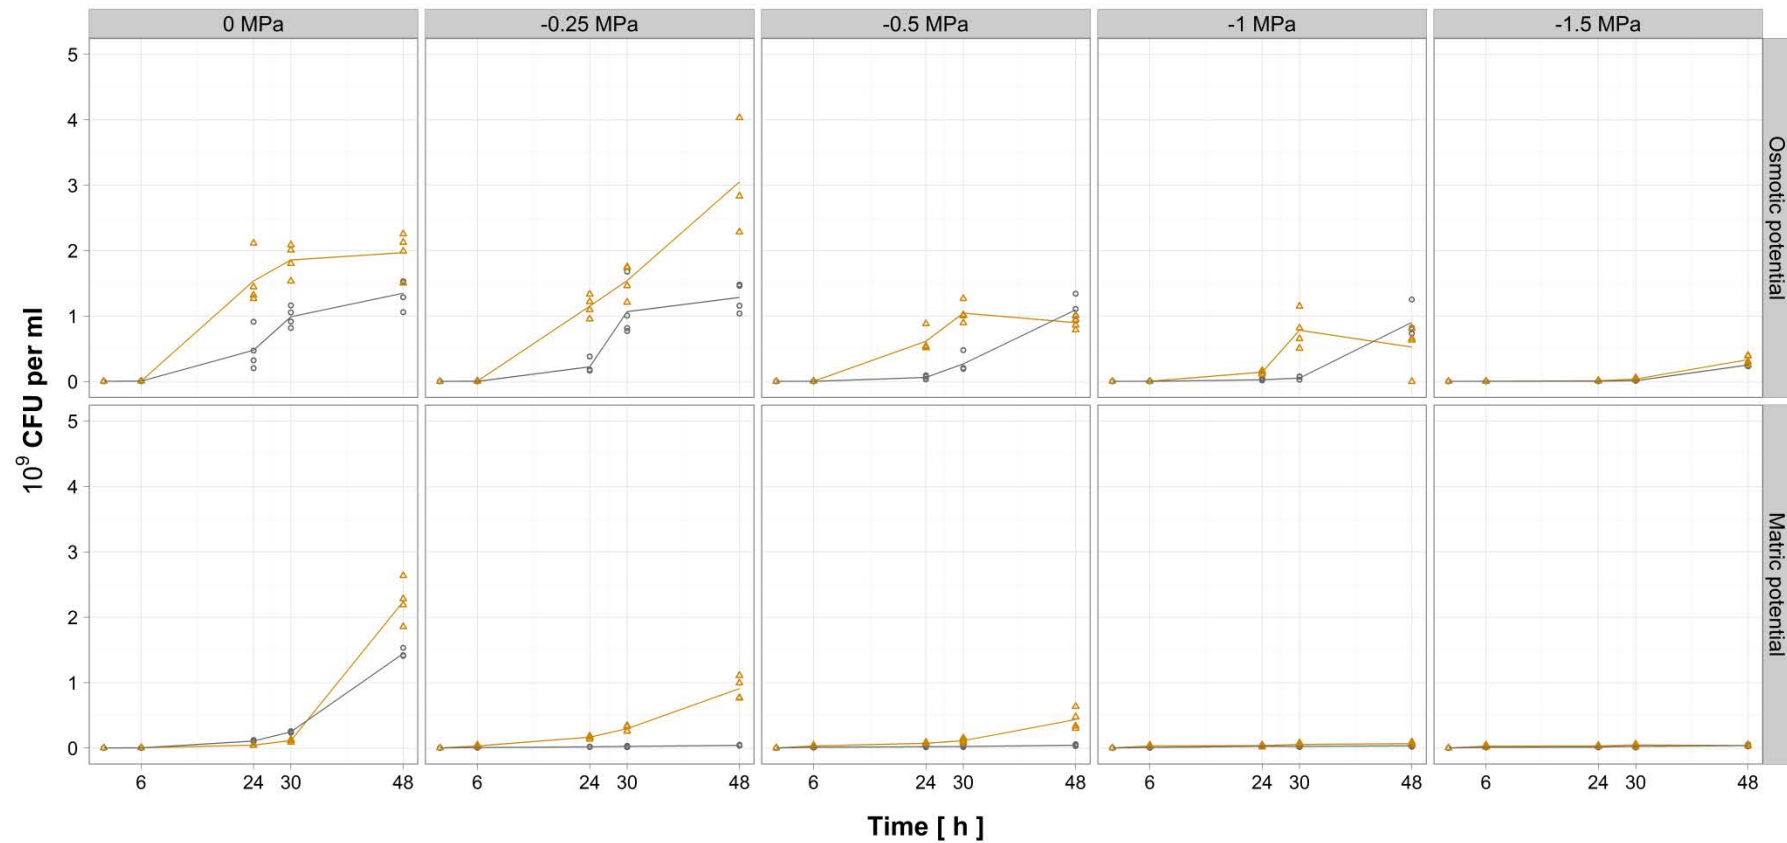

**Figure S2:** Growth of *P. putida* KT2440-gfp in absence (gray circles) and presence (orange triangles) of dispersal networks for the different  $\Delta\Psi_o$  and  $\Delta\Psi_m$ . Growth was analyzed by counting colony forming units (CFU) after 6, 24, 30 and 48 h. Individual points represent the values obtained from the replicate microcosms within the multiwell plate and the solid lines show the averages of replicates used for AUC calculation.

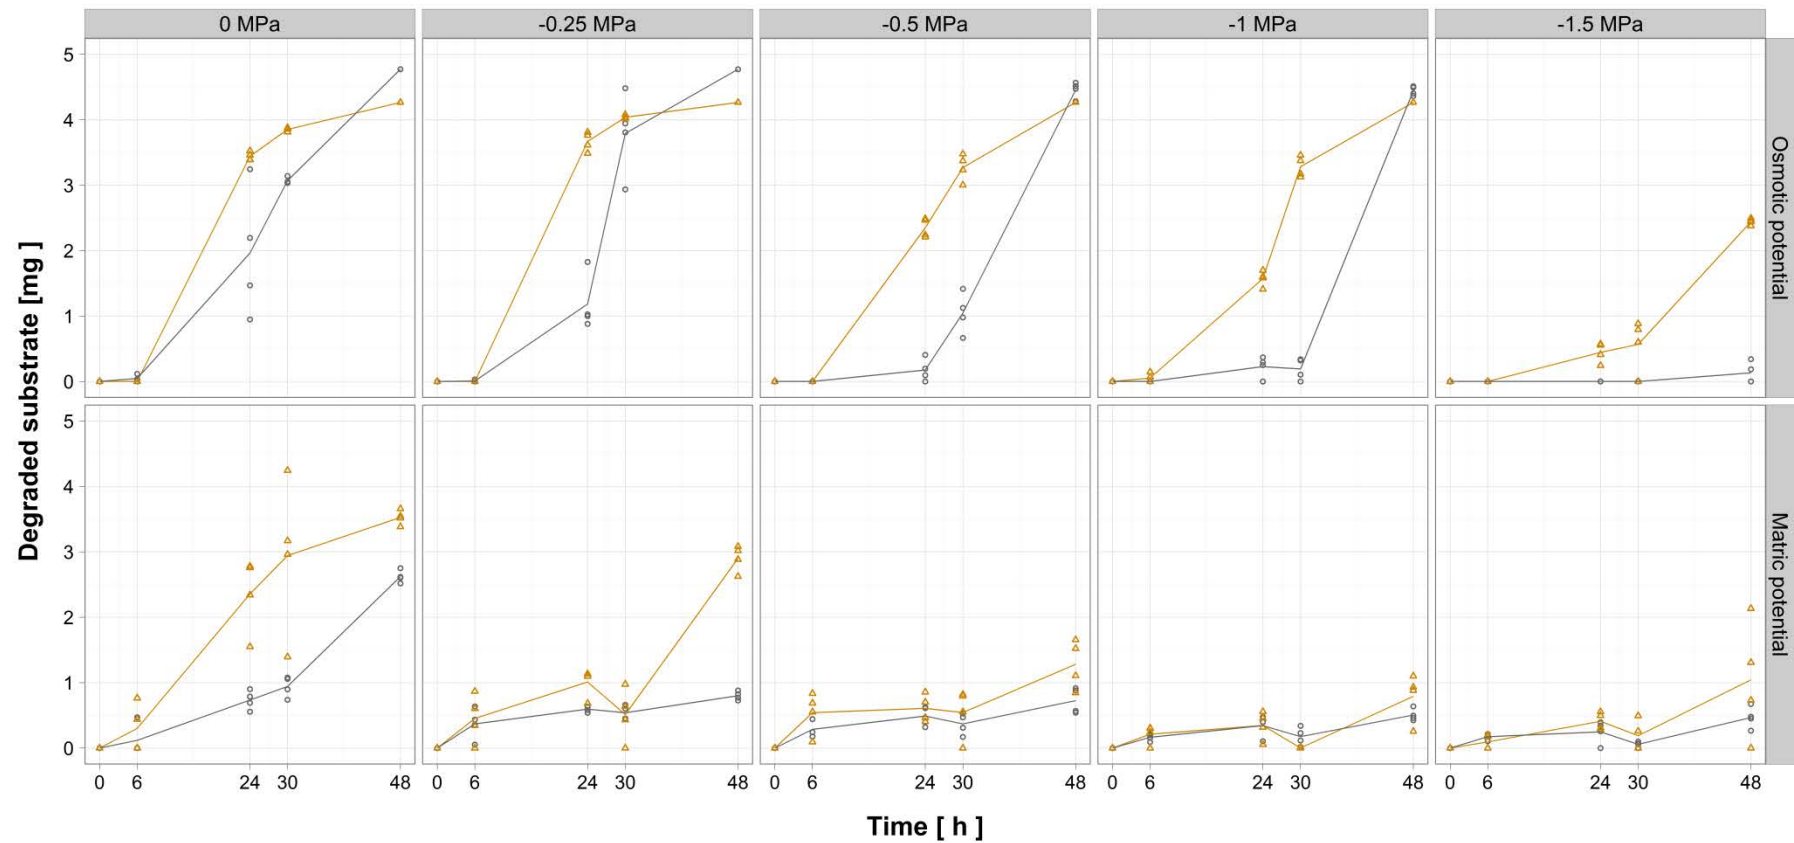

**Figure S3:** Benzoate degradation by *P. putida* KT2440-gfp in absence (gray circles) and presence (orange triangles) of dispersal networks for the different  $\Delta\Psi_o$  and  $\Delta\Psi_m$ . Degradation was analyzed by measuring the remaining benzoate concentration after 6, 24, 30 and 48 h. Individual points represent the values obtained from the replicate microcosms within the multiwell plate and the solid lines show the averages of replicates used for AUC calculation.
